# Supplementary material for: Green synthesis of tetrahydrobenzo[b]pyrans, pyrano[2,3-c]pyrazoles and spiro[indoline-3,4′-pyrano[2,3-c]pyrazoles catalyzed by nano-structured diphosphate in water
Source: Royal Society of Chemistry journal article supplement (doi:10.1039/c6ra15800e), 2016-01-01
Supplement: c6ra15800e1.pdf [file c6ra15800e1.pdf]

**Supporting information for:**  
**Green Synthesis of Tetrahydrobenzo[*b*]pyrans, Pyrano [2, 3-  
c]pyrazoles and Spiro [indoline-3,4'-pyrano[2,3-c]pyrazoles  
Catalyzed by Nano-structured diphosphate in Water**

**Behrooz Maleki<sup>\*1</sup>, Negar Nasiri<sup>1</sup>, Reza Tayebee<sup>1</sup> Amir Khojastehnezhad<sup>\*2</sup> and Hossien Ali Akhlaghi<sup>1</sup>**

*<sup>1</sup>Department of Chemistry, Hakim Sabzevari University, Sabzevar, 96179-76487, Iran*

*E-mail: malekibehrooz@gmail.com, Fax: +9844010300; Tel: +985144013324*

*<sup>2</sup>Young Researchers and Elite Club, Mashhad Branch, Islamic Azad University, Mashhad, Iran*

*E-mail: [akhojastehnezhad@yahoo.com](mailto:akhojastehnezhad@yahoo.com)*

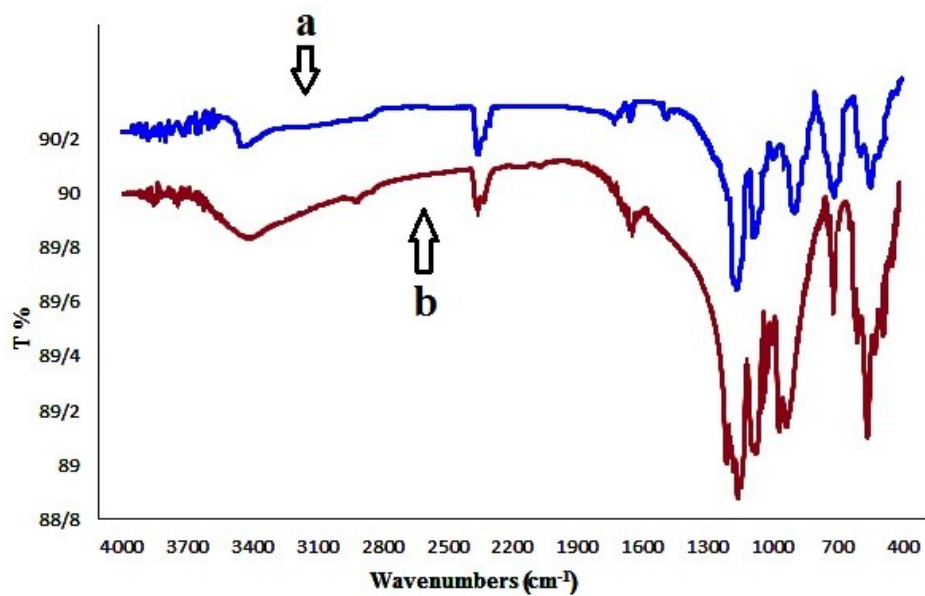

**Fig S1.** The FT-IR spectrum of (a) fresh DIPH and (b) after six consecutive runs.

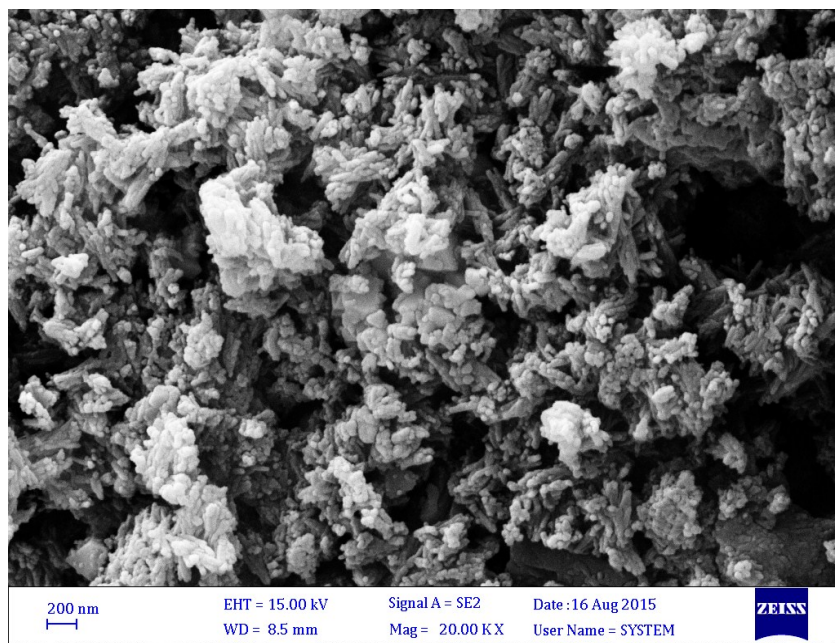

**Fig S2.** SEM image of DIPH.

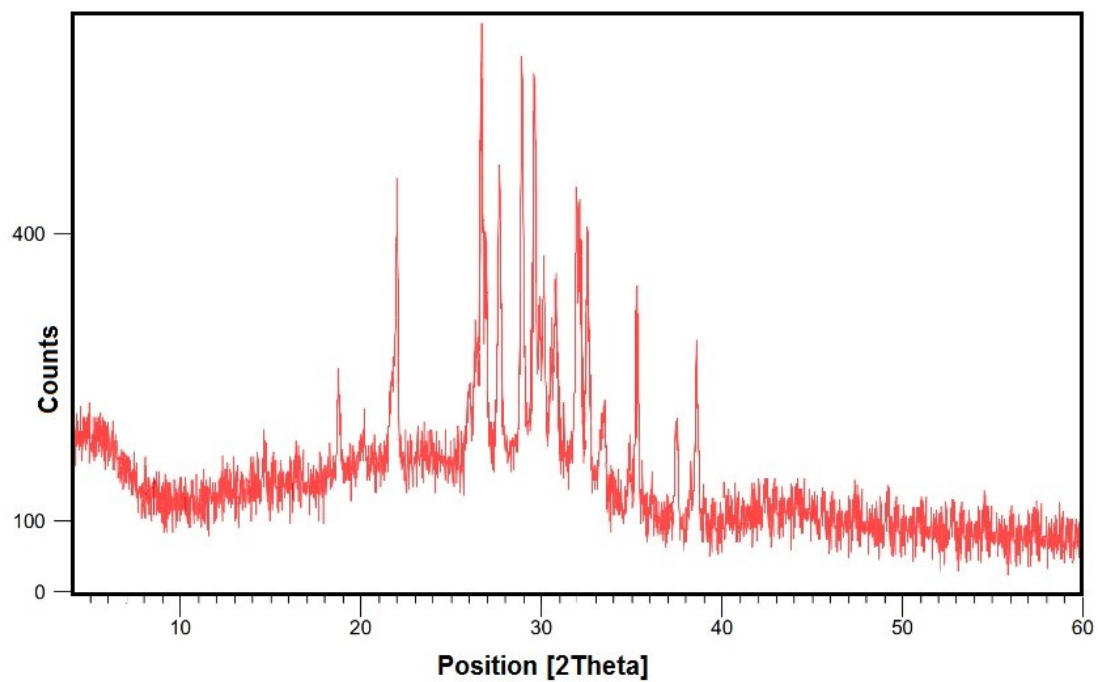

**Fig S3.** XRD pattern of DIPH.

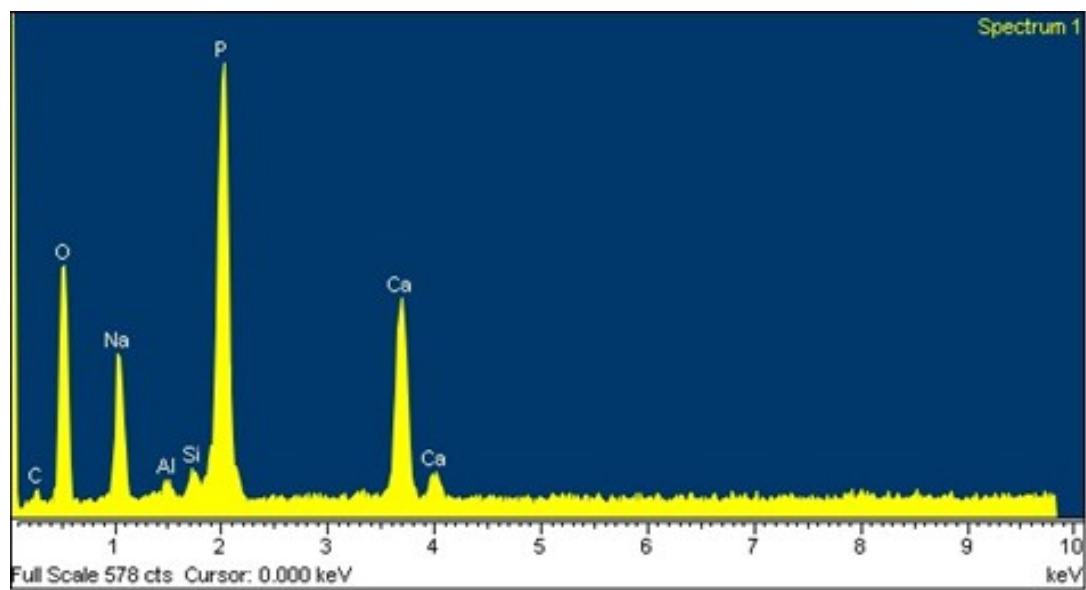

**Fig S4.** EDX pattern of DIPH.
